# Supplementary material for: Ultrasmall nanoparticles induce ferroptosis in nutrient-deprived cancer cells and suppress tumour growth
Source: Springer Nature journal article supplement (doi:10.1038/nnano.2016.164), 2016-09-26
Supplement: 41565_2016_BFnnano2016164_MOESM27_ESM.pdf [file 41565_2016_BFnnano2016164_MOESM27_ESM.pdf]

# Ultrasmall nanoparticles induce ferroptosis in nutrient-deprived cancer cells and suppress tumour growth

Supp Figure 1

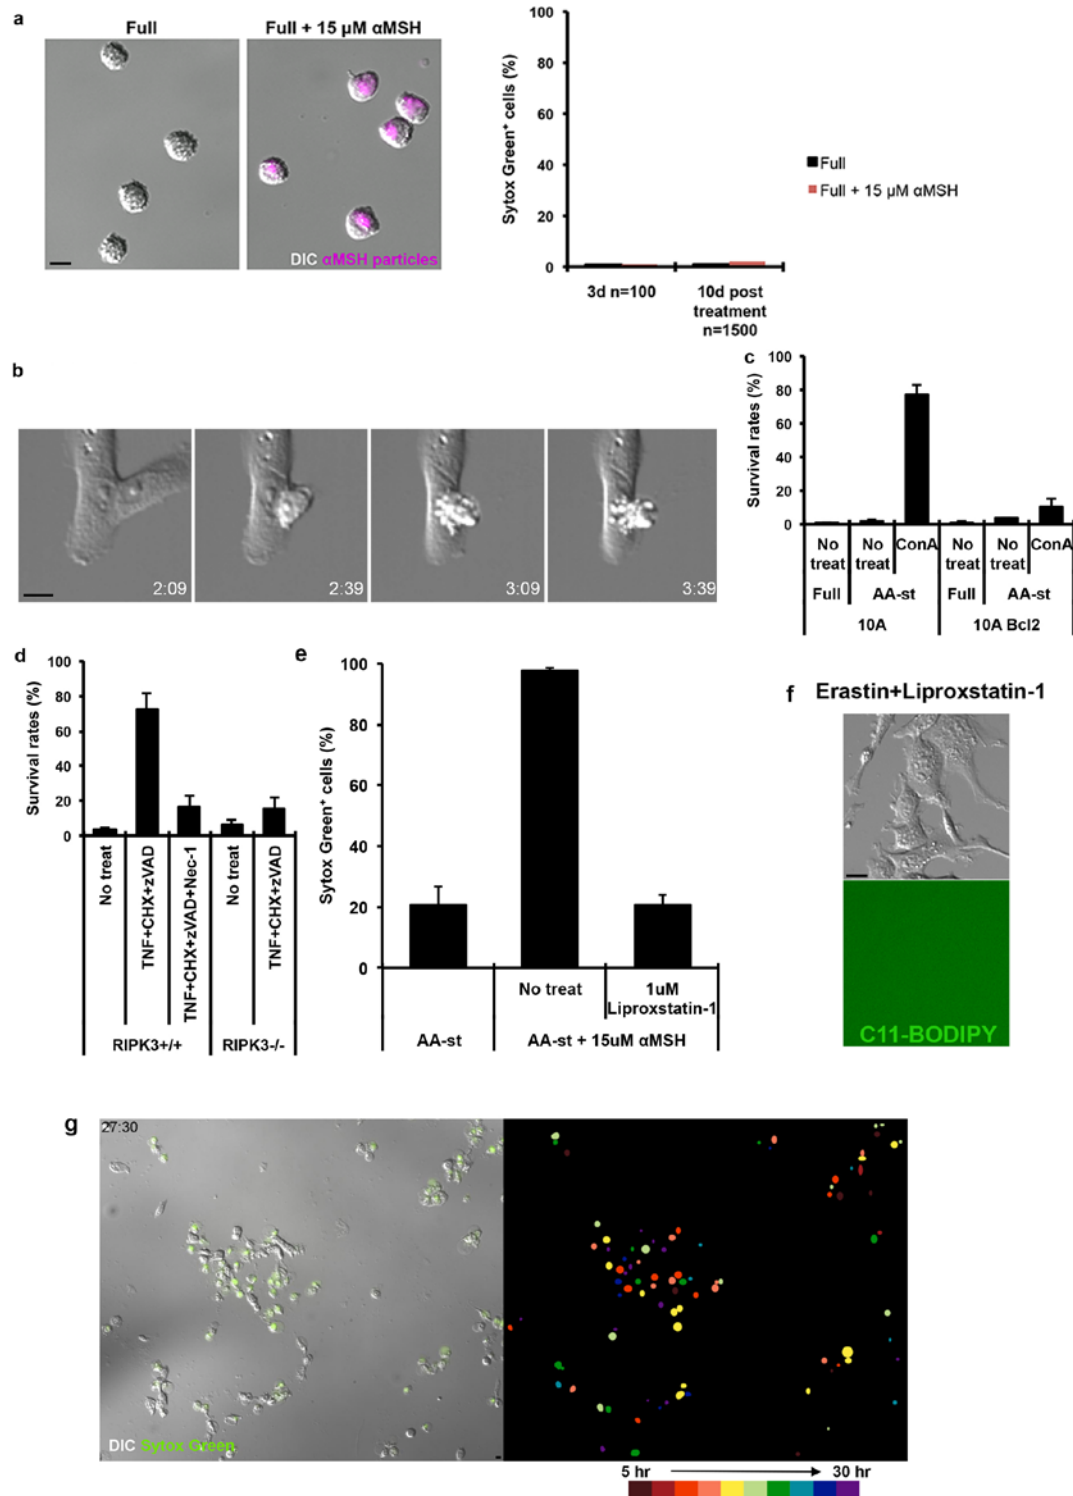

Supp Figure 2

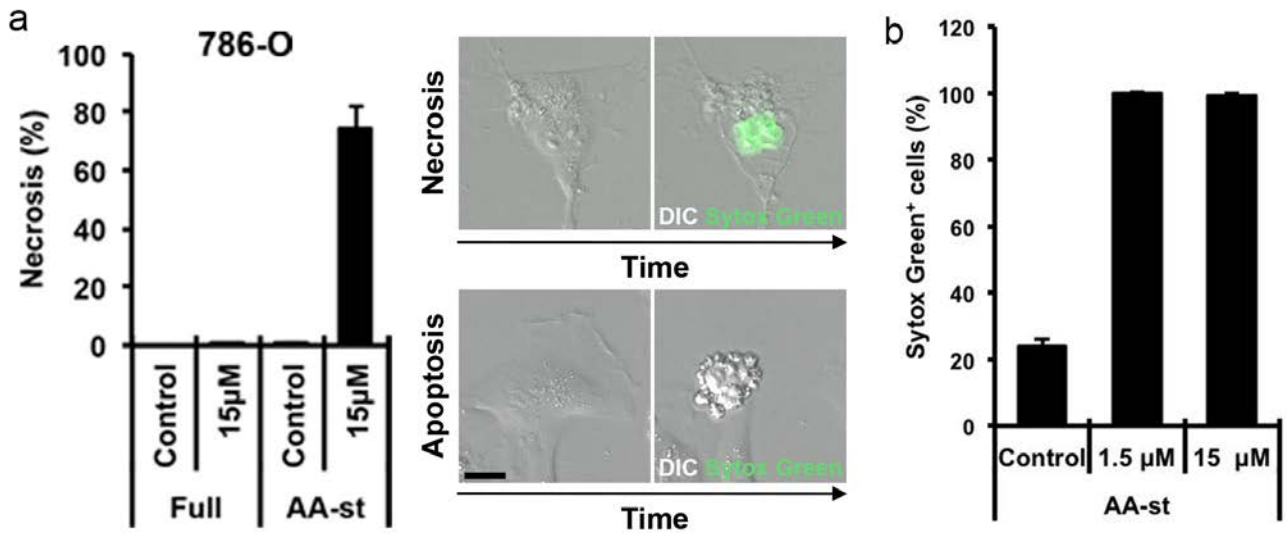

## Supp. Figure 3

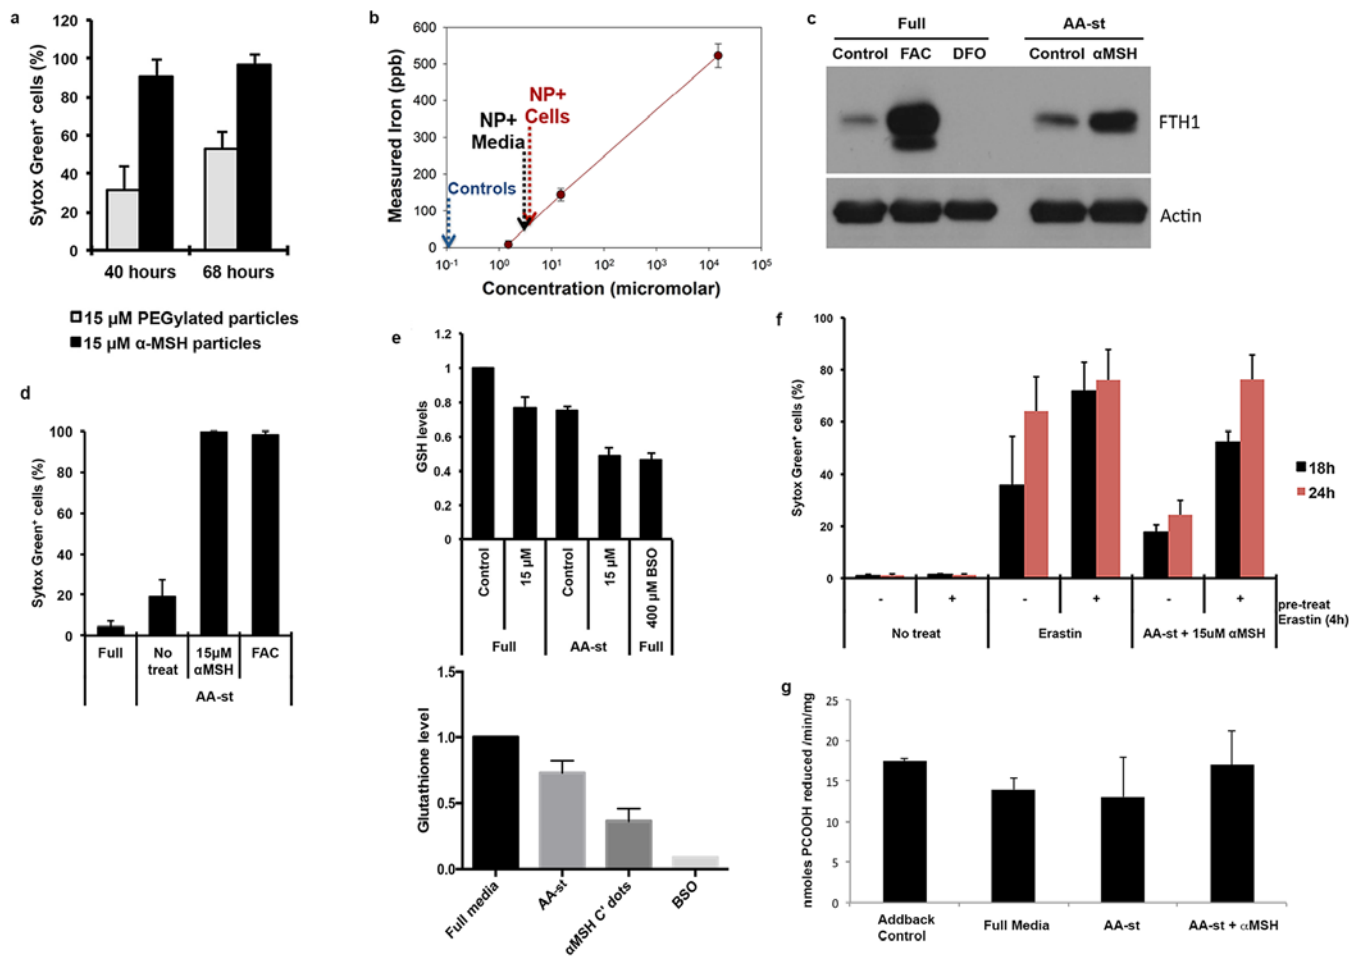

Supp Figure 4

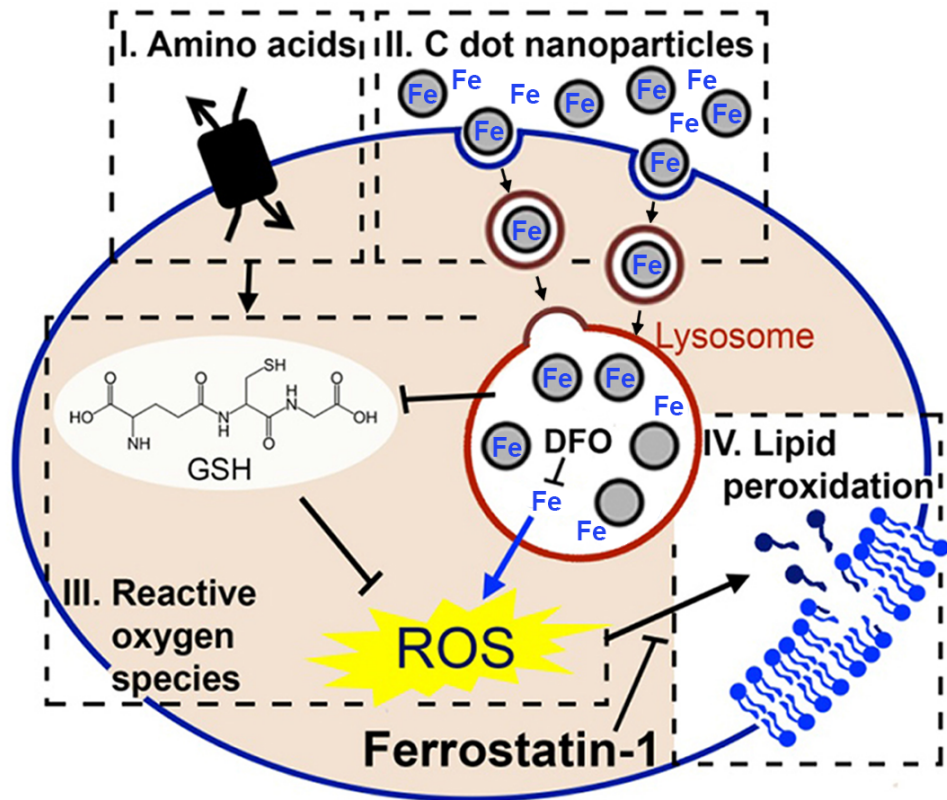

Supp. Fig. 5

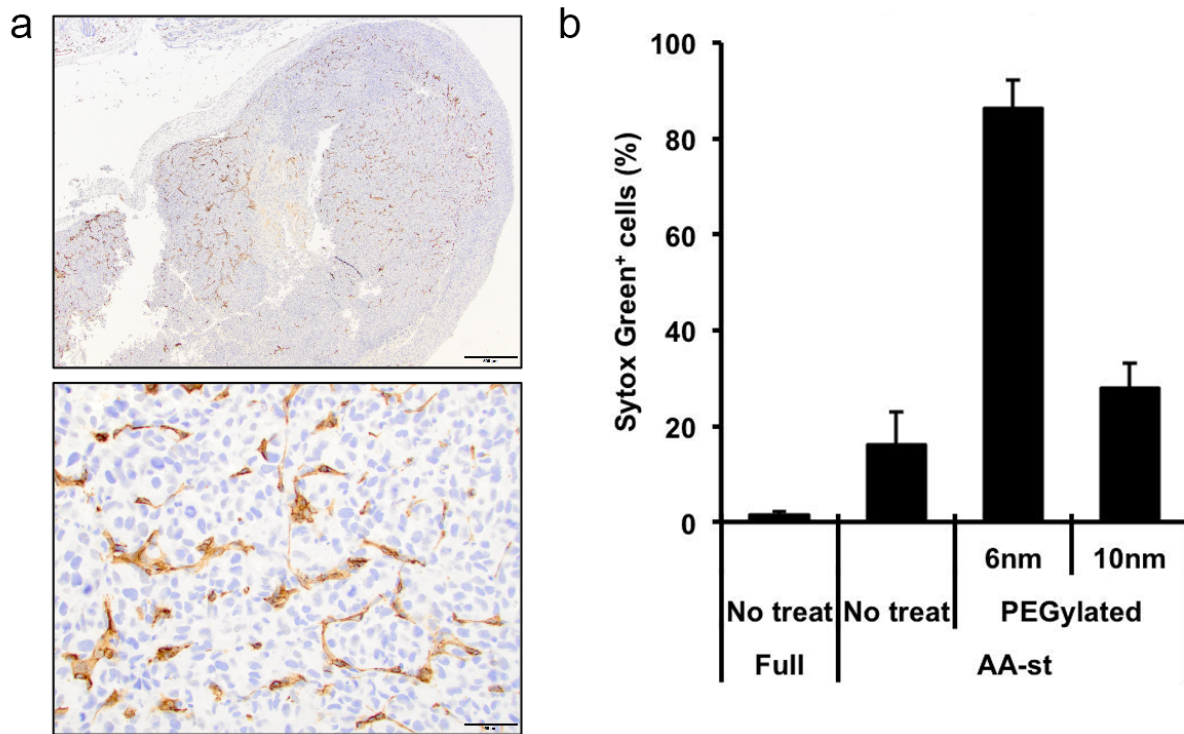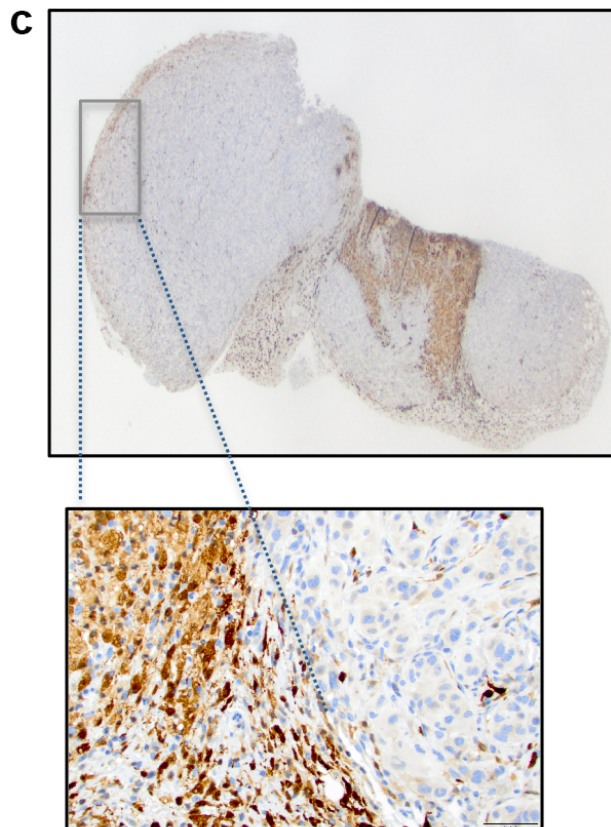

Supp. Figure 6

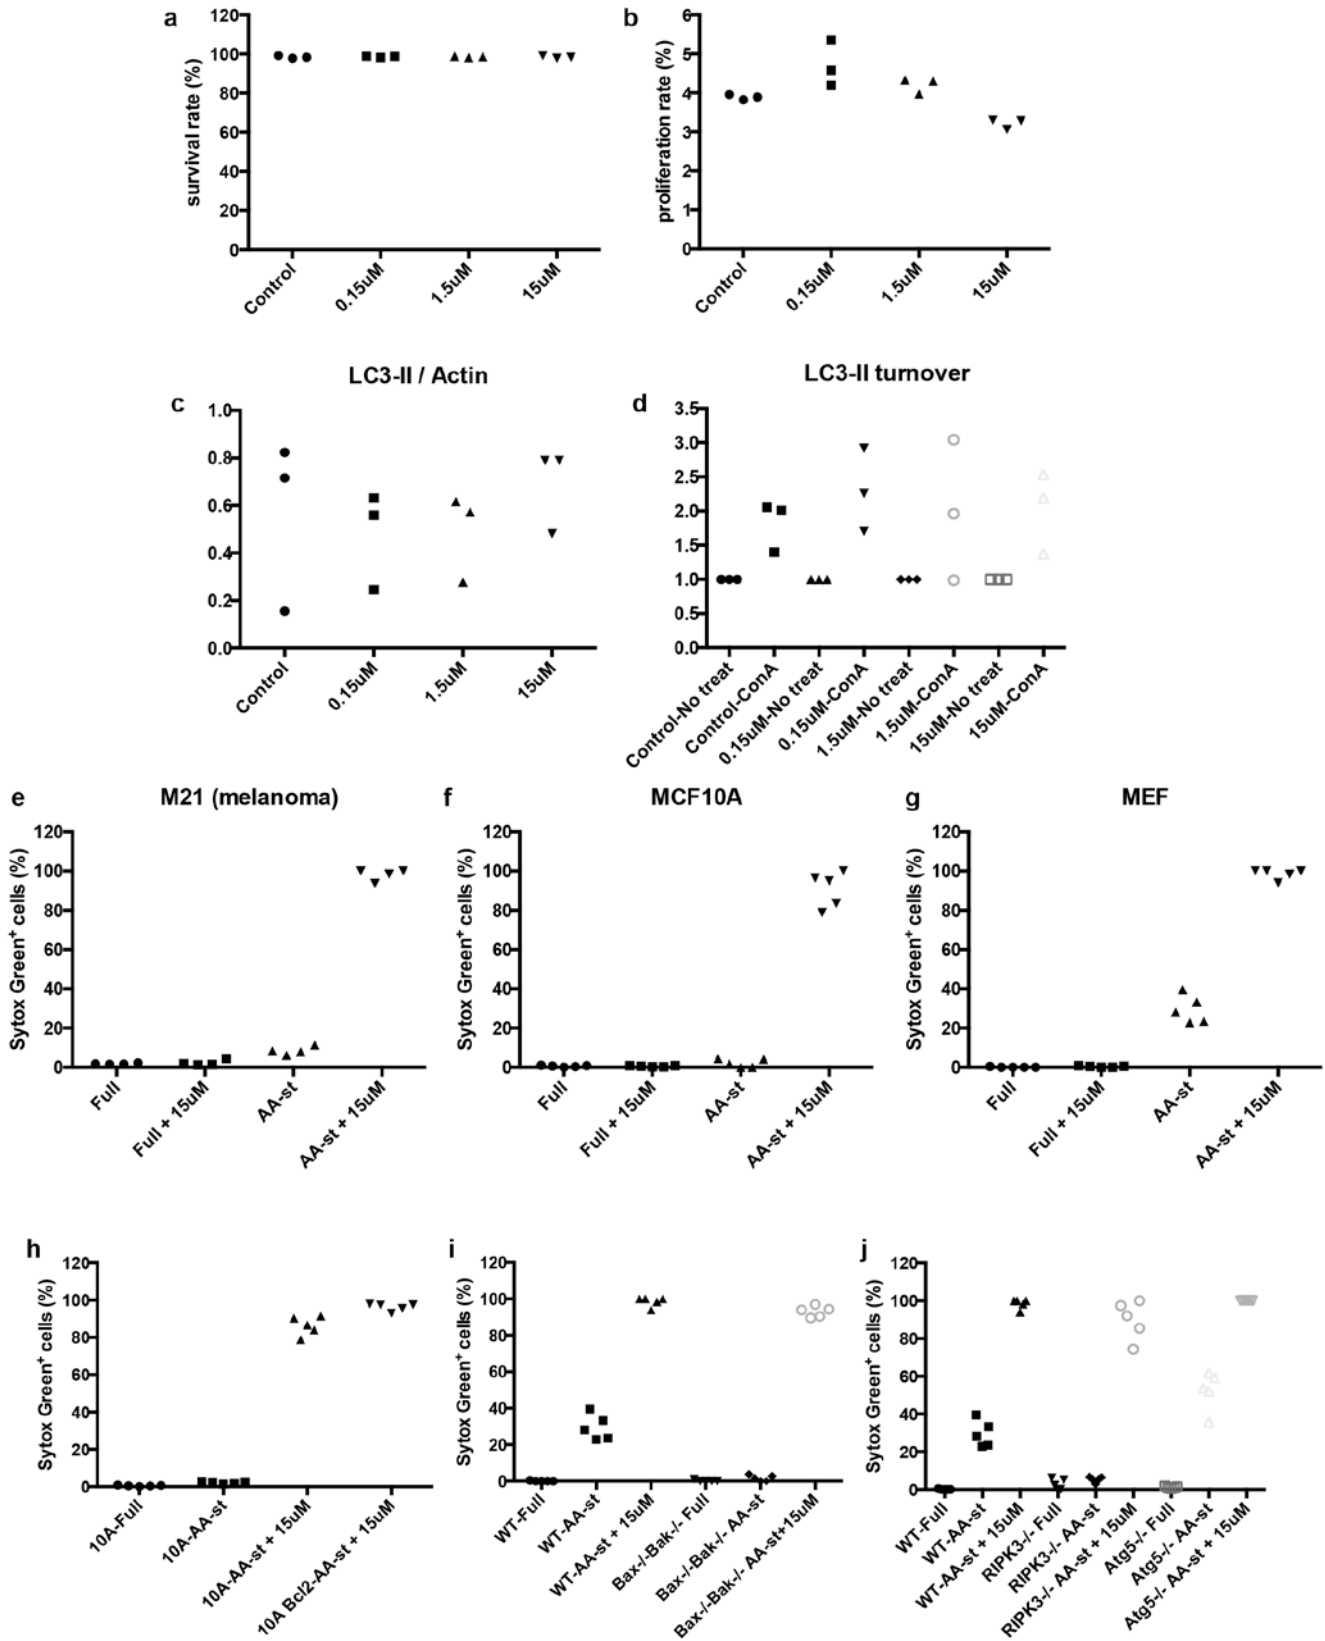



Supp. Figure 8

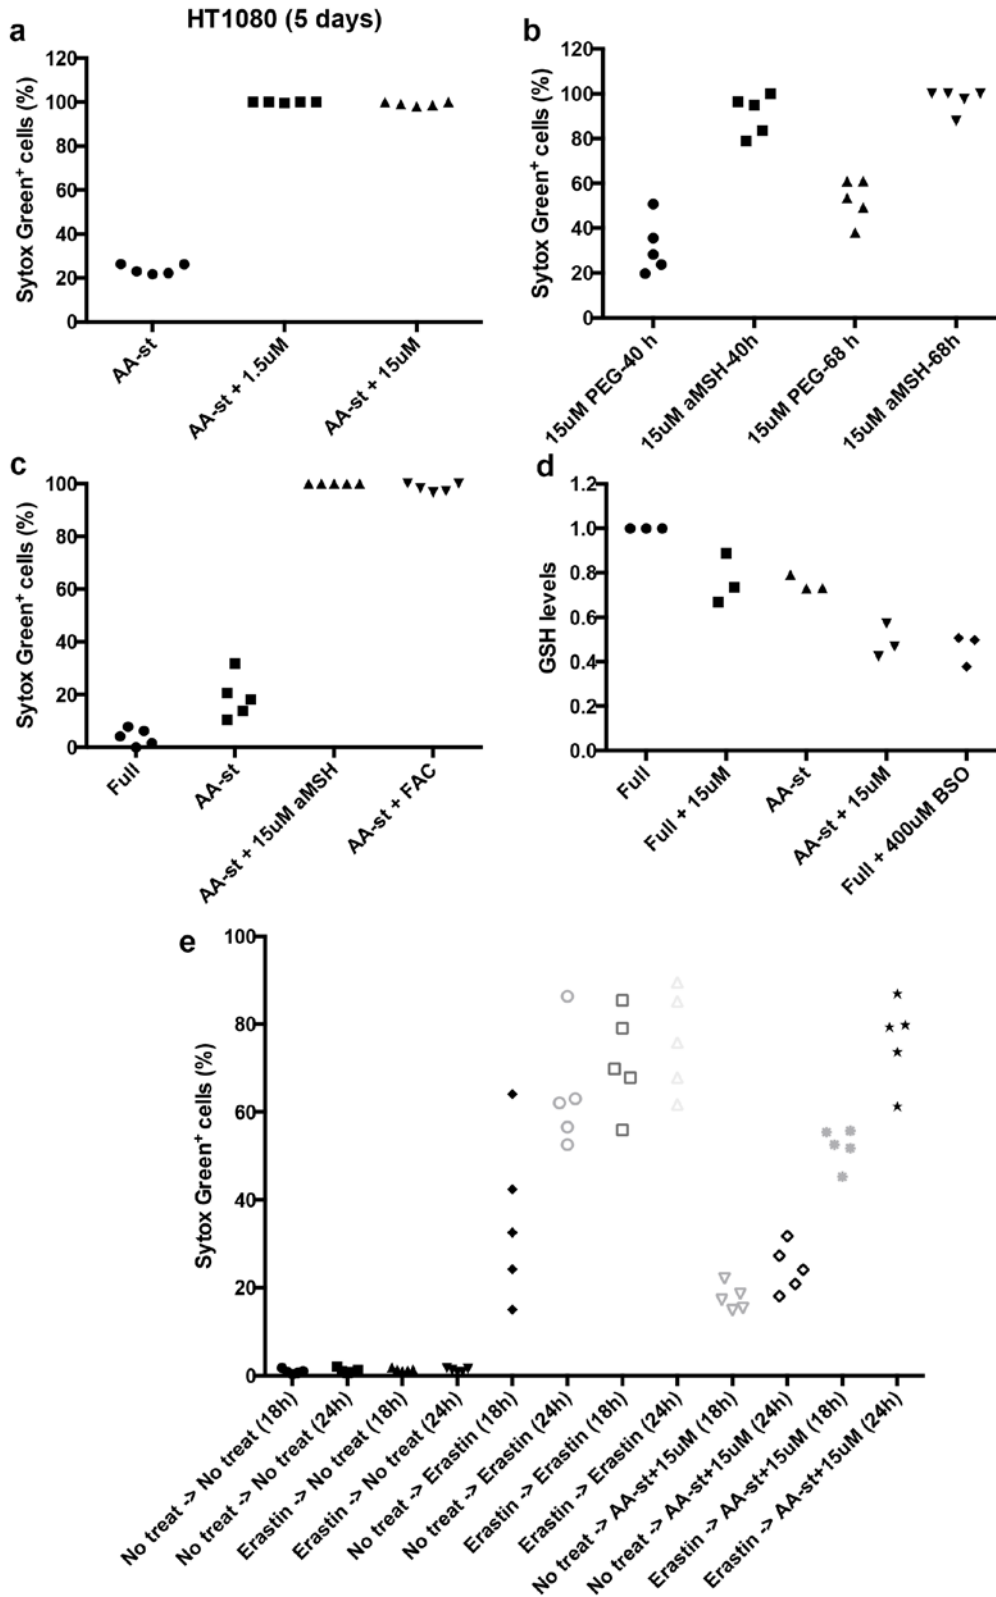



**Table S1. Iron Concentrations Measured by Microwave Plasma Atomic Emission Spectroscopy (MP-AES)**

| Specimen                                   | Iron-Containing Solution Concentrations (before purification) | <sup>†</sup> Measured Iron Concentration (ppb) +/- S.D. (after purification) | Concentration of Iron in C' dots or Cells ( $\mu\text{M}$ ) | Iron-loading Capacity |
|--------------------------------------------|---------------------------------------------------------------|------------------------------------------------------------------------------|-------------------------------------------------------------|-----------------------|
| C' dots, diluted full media*               | $\sim 6.5 \mu\text{M}$                                        | 33.6 +/- 18.6                                                                | 0.60                                                        | 46.2%                 |
| C' dots, diluted AA-free media*            | $\sim 6.5 \mu\text{M}$                                        | 33.9 +/- 16.3                                                                | 0.61                                                        | 46.9%                 |
| C' dots, $\text{Fe}^{3+}$ -doped solution  | $1.5 \mu\text{M}$                                             | 8.32 +/- 12.9                                                                | 0.15                                                        | 50.0%                 |
| C' dots, $\text{Fe}^{3+}$ -doped solution  | $15.0 \mu\text{M}$                                            | 144.7 +/- 16.3                                                               | 2.58                                                        | 86.0%                 |
| C' dots, $\text{Fe}^{3+}$ -doped solution  | $1.5 \text{ mM}$                                              | 522.6 +/- 32.6                                                               | 9.33                                                        | 3.1%                  |
| C' dots only                               | NA                                                            | BDL                                                                          | BDL                                                         | NA                    |
|                                            |                                                               |                                                                              |                                                             |                       |
| C' dot-exposed HT1080 cells, AA-free media | $\sim 8.6 \mu\text{M}$                                        | 37.6 +/- 7.8                                                                 | 0.67                                                        | $\sim 8.0\%$          |
| HT1080 cells, AA-free media                | $\sim 8.6 \mu\text{M}$                                        | BDL                                                                          | BDL                                                         | NA                    |

BDL, below detection limit; NA not applicable

\*iron present in undiluted full and AA-free media is  $8.6 \mu\text{M}$

<sup>†</sup>re-suspended in water or phosphate buffer solution

**Table S2.** Metabolic concentration profiles in tumor-bearing mice

|                          |                          | <i>HT1080</i><br>Particle-Exposed<br>Female |      |      | <i>HT1080</i><br>Saline Vehicle<br>Male                      Female |      |      |      |      |      | <i>786-O</i><br>Particle-Exposed<br>Female |      |      | <i>786-O</i><br>Saline Vehicle<br>Male |     |      |
|--------------------------|--------------------------|---------------------------------------------|------|------|---------------------------------------------------------------------|------|------|------|------|------|--------------------------------------------|------|------|----------------------------------------|-----|------|
| <b>Metabolic profile</b> | Na (mEq/L)               | 151                                         | 149  | 153  | 156                                                                 | 156  | 152  | 152  | 156  | 152  | 157                                        | 157  | 154  | 155                                    | QNS | QNS  |
|                          | K (mEq/L)                | 8.1                                         | 9.2  | 8.2  | 9.6                                                                 | 9.3  | 10.7 | 9.1  | 8.2  | 8.5  | 8.5                                        | 8.8  | 10.1 | 8.8                                    | QNS | QNS  |
|                          | Cl (mEq/L)               | 111                                         | 111  | 111  | 108                                                                 | 109  | 109  | 117  | 113  | 112  | 114                                        | 115  | 113  | 110                                    | QNS | QNS  |
|                          | TCO <sub>2</sub> (mEq/L) | 26                                          | 24   | 26   | 13                                                                  | 23   | 21   | 18   | 23   | 23   | 14                                         | 11   | 10   | 18                                     | QNS | 15   |
|                          | Ca (mg/dL)               | 10.5                                        | 10.2 | 10.2 | 10.3                                                                | 10.3 | 9.7  | 10.5 | 10.4 | 10.3 | 9.7                                        | 10.0 | 10.4 | 10.1                                   | 6.4 | 9.2  |
|                          | P (mg/dL)                | 9.2                                         | 9.0  | 8.6  | 9.1                                                                 | 10.0 | 9.1  | 9.5  | 8.6  | 7.6  | 9.4                                        | 9.0  | 10.8 | 9.9                                    | 8.5 | 10.0 |
| <b>Renal</b>             | GLU (mg/dL)              | 179                                         | 184  | 192  | 108                                                                 | 153  | 149  | 216  | 164  | 215  | 142                                        | 208  | 224  | 210                                    | 149 | 160  |
|                          | BUN (mg/dL)              | 12                                          | 18   | 19   | 29                                                                  | 28   | 30   | 19   | 21   | 23   | 16                                         | 17   | 16   | 24                                     | 19  | 21   |
|                          | Crea (mg/dL)             | 0.2                                         | 0.2  | 0.24 | 0.12                                                                | 0.12 | 0.03 | 0.20 | 0.23 | 0.21 | 0.10                                       | 0.11 | 0.13 | 0.18                                   | QNS | QNS  |
|                          | ALP (U/L)                | 29                                          | 37   | 58   | 67                                                                  | 71   | 45   | 73   | 56   | 48   | 106                                        | 95   | 120  | 71                                     | 60  | 55   |
|                          | AST (U/L)                | 140                                         | 293  | 120  | 113                                                                 | 67   | 119  | 365  | 149  | 209  | 188                                        | 156  | 1100 | 68                                     | 214 | 43   |
|                          | ALT (U/L)                | 15                                          | 94   | 30   | 24                                                                  | 18   | 25   | 158  | 57   | 71   | 87                                         | 66   | 509  | 34                                     | 144 | 21   |
|                          | GGT (U/L)                | 0                                           | 0    | 0    | 0                                                                   | 0    | 0    | 0    | 0    | 0    | 0                                          | 0    | 0    | 0                                      | 0   | 0    |
|                          | TBIL (mg/dL)             | 0.8*                                        | 0.8* | 0.9* | 0.2                                                                 | 0.3  | 0.4  | 0.3  | 0.2  | 0.3  | 0.8*                                       | 0.7* | 0.9* | 0.2                                    | 0.2 | 0.1  |
|                          | DBIL (mg/dL)             | 0.1                                         | 0.1  | 0.1  | 0.0                                                                 | 0.0  | 0.0  | 0.0  | 0.0  | 0.1  | 0.1                                        | 0.1  | 0.1  | 0.1                                    | 0.0 | 0.0  |
|                          | IBIL (mg/dL)             | 0.7*                                        | 0.7* | 0.8* | 0.2                                                                 | 0.3  | 0.4  | 0.3  | 0.2  | 0.2  | 0.7*                                       | 0.6* | 0.8* | 0.1                                    | 0.2 | 0.1  |
| <b>Hepatic function</b>  | TP (g/L)                 | 4.9                                         | 4.9  | 5.1  | 5.3                                                                 | 5.2  | 5.3  | 5.3  | 5.3  | 5.3  | 4.9                                        | 5.1  | 5.4  | 5.0                                    | 5.6 | 5.3  |
|                          | ALB (g/L)                | 3.8                                         | 3.9  | 3.9  | 3.3                                                                 | 3.1  | 3.1  | 3.3  | 3.2  | 3.2  | 3.1                                        | 3.2  | 3.3  | 2.9                                    | 3.3 | 3.0  |
|                          | GLOB (g/dL)              | 1.9                                         | 2.0  | 2.0  | 2.0                                                                 | 2.1  | 2.2  | 2.0  | 2.1  | 2.1  | 1.8                                        | 1.9  | 2.1  | 2.1                                    | 2.3 | 2.3  |
|                          | CHOL (mg/dL)             | 86                                          | 83   | 88   | 82                                                                  | 98   | 104  | 99   | 108  | 118  | 72                                         | 71   | 88   | 99                                     | 67  | 90   |
|                          | TRIG (mg/dL)             | 94                                          | 74   | 96   | 89                                                                  | 159  | 127  | 84   | 88   | 85   | 95                                         | 94   | 94   | 89                                     | 151 | 92   |
|                          | CK (U/L)                 | 442                                         | 506  | 325  | 50                                                                  | 122  | 255  | 616  | 300  | 358  | 63                                         | 117  | 458  | 100                                    | 53  | 36   |

Na, sodium; K, potassium; Cl, chloride; TCO<sub>2</sub>, total carbon dioxide; Ca, calcium; P, phosphorus; GLU, glucose; BUN, blood urea nitrogen; Crea, creatinine; ALP, alkaline phosphatase; AST, aspartate aminotransferase; ALT, alanine aminotransferase; GGT, gamma-glutamyl transferase; TBIL, total bilirubin; DBIL, direct bilirubin; IBIL, indirect bilirubin; TP, total protein; ALB, albumin; GLOB, globulin; CHOL, cholesterol; TRIG, triglyceride; CK, creatine kinase; \*, elevated relative to normal values

**Table S3.** Hematologic profiles in tumor-bearing mice

|                   |              | 786-O<br>Particle-Exposed<br>Female |       |       | 786-O<br>Saline Vehicle<br>Male |       |       |
|-------------------|--------------|-------------------------------------|-------|-------|---------------------------------|-------|-------|
| <b>Hematology</b> | RBC (M/uL)   | 9.87                                | 9.79  | 10.50 | 9.53                            | 9.30  | 9.13  |
|                   | HGB (g/dL)   | 15.3                                | 15.0  | 16.5  | 14.4                            | 14.2  | 14.0  |
|                   | HCT (%)      | 52.1                                | 52.0  | 57.4  | 49.8                            | 48.7  | 48.2  |
|                   | MCV (fL)     | 52.8                                | 53.1  | 54.7  | 52.3                            | 52.4  | 52.8  |
|                   | MCH (pg)     | 15.5                                | 15.3  | 15.7  | 15.1                            | 15.3  | 15.3  |
|                   | MCHC (g/dL)  | 29.4                                | 28.8  | 28.7  | 28.9                            | 29.2  | 29.0  |
|                   | RDW-SD (fL)  | 31.4                                | 32.3  | 31.0  | 29.9                            | 29.3  | 30.7  |
|                   | RDW-CV (%)   | 23.5                                | 23.5  | 23.0  | 22.5                            | 22.2  | 22.3  |
|                   | RET (K/uL)   | 436.3                               | 470.9 | 573.3 | 487.9                           | 444.5 | 454.7 |
|                   | RET (%)      | 4.42                                | 4.81  | 5.46  | 5.12                            | 4.78  | 4.98  |
|                   | PLT (K/uL)   | 908                                 | 650   | 682   | 365                             | 294   | 985   |
|                   | PDW (fL)     | 7.0                                 | 7.0   | 7.1   | 7.8                             | 8.2   | 6.6   |
|                   | MPV (fL)     | 6.2                                 | 6.1   | 6.5   | 6.7                             | 6.9   | 6.1   |
|                   | WBC (K/uL)   | 2.25                                | 1.93  | 2.21  | 3.22                            | 2.73  | 3.75  |
|                   | NEUT (K/uL)  | 0.86                                | 0.82  | 0.70  | 1.65                            | 1.32  | 2.36  |
|                   | LYMPH (K/uL) | 0.84                                | 0.84  | 0.80  | 1.06                            | 1.01  | 0.93  |
|                   | MONO (K/uL)  | 0.46                                | 0.14  | 0.58  | 0.34                            | 0.28  | 0.35  |
|                   | EO (K/uL)    | 0.09                                | 0.13  | 0.12  | 0.16                            | 0.10  | 0.10  |
|                   | BASO (K/uL)  | 0.00                                | 0.00  | 0.01  | 0.01                            | 0.02  | 0.01  |
|                   | NEUT (%)     | 38.3                                | 42.5  | 31.7  | 51.2                            | 48.3  | 62.9  |
|                   | LYMPH (%)    | 37.3                                | 43.5  | 36.2  | 32.9                            | 37.0  | 24.8  |
|                   | MONO (%)     | 20.4                                | 7.3   | 26.2  | 10.6                            | 10.3  | 9.3   |
|                   | EO (%)       | 4.0                                 | 6.7   | 5.4   | 5.0                             | 3.7   | 2.7   |
| BASO (%)          | 0.0          | 0.0                                 | 0.5   | 0.3   | 0.7                             | 0.3   |       |

RBC, red blood cell; HGB, hemoglobin concentration; HCT, hematocrit; MCV, mean corpuscular volume; MCH, mean corpuscular hemoglobin; MCHC, mean corpuscular hemoglobin concentration; RDW-SD and RDW-CV, red blood cell distribution width standard deviation and coefficient of variance; RET, reticulocyte relative and absolute counts; PLT, platelet count; PDW, platelet distribution width; MPV, mean platelet volume; WBC, white blood cell; and relative and absolute counts of NEUT, neutrophils, LYMPH, lymphocytes, MONO, monocytes, EO, eosinophils, BASO, basophils

**Table S4.** Histopathologic profiles in tumor-bearing mice

|                       | <i>HT1080 Particle-Exposed Female</i> |                                                                                   | <i>HT1080 Saline Vehicle Female</i> |                                 | <i>786-O Particle-Exposed Female</i> |                                | <i>786-O Saline Vehicle Male</i>                      |                                |
|-----------------------|---------------------------------------|-----------------------------------------------------------------------------------|-------------------------------------|---------------------------------|--------------------------------------|--------------------------------|-------------------------------------------------------|--------------------------------|
| <b>Tumor H&amp;E</b>  | SQ tumor consistent with HT1080       | SQ tumor consistent with HT1080                                                   | SQ tumor consistent with HT1080     | SQ tumor consistent with HT1080 | SQ tumor consistent with 786-O       | SQ tumor consistent with 786-O | SQ tumor consistent with 786-O                        | SQ tumor consistent with 786-O |
| <b>Tumor Mac2</b>     | Marked                                | Marked                                                                            | Mild                                | Mild                            | Marked                               | Marked                         | ND                                                    | ND                             |
| <b>Liver H&amp;E</b>  | N.                                    | Hepatitis, histiocytic and neutrophilic, 1, MFR; Extramedullary hematopoiesis, 1. | N.                                  | N.                              | N.                                   | N.                             | N.                                                    | N.                             |
| <b>Kidney H&amp;E</b> | Cortical tubular cyst, F, U.          | N.                                                                                | N.                                  | N.                              | N.                                   | N.                             | Cortical tubular necrosis and regeneration, 1, MF, U. | N.                             |

SQ, subcutaneous; N, normal; Mac2, macrophage immunohistochemical marker; N: Normal, F: Focal, FE: Focally extensive, MF: Multifocal, MFR: Multifocal random, D: Diffuse, U: Unilateral, 1: Minimal, 2: Mild, 3: Moderate, 4: Marked.
